# Supplementary material for: Diverse viral proteases activate the NLRP1 inflammasome
Source: eLife. 2021 Jan 7;10:e60609. doi: 10.7554/eLife.60609 (PMC7857732; doi:10.7554/eLife.60609)
Supplement: Figure 3—source data 1. [file elife-60609-fig3-data1.xlsx]

## Sheet: Sheet1
Source data for Figure 3
Individual data values for IL-1b release for the indicated figures.
Data were obtained as described in the appropriate figure legend and methods section.
Source data for Figure 3B
		IL-1b ng/ml
NLRP1	Protease	Replicate 1	Replicate 2	Replicate 3
None	None	0.170789	0.212895	0.197105
None	CVB3	0.344474	0.302368	0.255
None	CVB3 mutant (C147A)	0.781316	0.144474	0.160263
None	TEV	0.333947	0.133947	0.186579
WT	None	0.349737	0.186579	0.149737
WT	CVB3	4.91289	5.22868	5.53395
WT	CVB3 mutant (C147A)	0.170789	0.160263	0.186579
WT	TEV	0.170789	0.160263	0.197105
G131P	None	0.165526	0.191842	0.212895
G131P	CVB3	0.470789	0.507632	0.181316
G131P	CVB3 mutant (C147A)	0.470789	0.802368	0.149737
G131P	TEV	0.386579	0.518158	0.155
WT-TEV	None	0.149737	0.791842	0.165526
WT-TEV	CVB3	4.83395	5.41289	5.51289
WT-TEV	CVB3 mutant (C147A)	0.170789	0.170789	0.191842
WT-TEV	TEV	4.47605	4.86553	5.68658
Source data for Figure 3C
		IL-1b pg/ml
NLRP1	Virus	Replicate 1	Replicate 2	Replicate 3
None	None	6.12808	3.36946	5.73399
None	CVB3	9.67488	5.73399	5.14286
WT	None	9.08374	10.8571	11.8424
WT	CVB3	142.089	124.355	79.0345
G131P	None	10.4631	13.6158	11.8424
G131P	CVB3	10.8571	6.32512	5.93103
Source data for Figure 3D
		IL-1b pg/ml
HaCaT	Virus	Replicate 1	Replicate 2	Replicate 3
WT	None	0.440945	1.54331	0.755906
NLRP1 KO clone #1	None	-0.188976	-1.6063	-1.6063
NLRP1 KO clone #2	None	1.54331	1.54331	2.17323
CASP1 KO clone #1	None	-0.0314961	-0.503937	-0.0314961
CASP1 KO clone #2	None	0.125984	0.440945	-0.188976
WT	CVB3	30.8346	28.6299	28.4724
NLRP1 KO clone #1	CVB3	0.913386	4.06299	2.96063
NLRP1 KO clone #2	CVB3	1.22835	1.70079	1.54331
CASP1 KO clone #1	CVB3	6.26772	7.37008	12.4094
CASP1 KO clone #2	CVB3	2.01575	3.74803	10.6772
