# Supplementary material for: Diverse viral proteases activate the NLRP1 inflammasome
Source: eLife. 2021 Jan 7;10:e60609. doi: 10.7554/eLife.60609 (PMC7857732; doi:10.7554/eLife.60609)
Supplement: Figure 4—source data 1. [file elife-60609-fig4-data1.xlsx]

## Sheet: Sheet1
Source data for Figure 4
Individual data values for IL-1b release for the indicated figures.
Data were obtained as described in the appropriate figure legend and methods section.
Source data for Figure 4F
		IL-1b ng/ml
NLRP1	Protease	Replicate 1	Replicate 2	Replicate 3
WT	None	0.526084	0.250222	0.273211
WT	CVB3	8.18126	5.67551	3.51459
WT	CVB3 mutant (C147A)	0.13528	0.480107	0.181257
G127E	None	0.0663142	0.365165	0.204245
G127E	CVB3	0.158268	0.319188	0.273211
G127E	CVB3 mutant (C147A)	0.112291	0.342176	0.319188
G131R	None	0.204245	0.158268	0.319188
G131R	CVB3	0.112291	0.250222	0.250222
G131R	CVB3 mutant (C147A)	0.13528	0.273211	0.296199
Q130R	None	0.480107	0.273211	0.273211
Q130R	CVB3	0.526084	0.250222	0.204245
Q130R	CVB3 mutant (C147A)	0.112291	0.112291	0.227234
