# Supplementary material for: Diverse viral proteases activate the NLRP1 inflammasome
Source: eLife. 2021 Jan 7;10:e60609. doi: 10.7554/eLife.60609 (PMC7857732; doi:10.7554/eLife.60609)
Supplement: Figure 5—source data 1. [file elife-60609-fig5-data1.xlsx]

## Sheet: Sheet1
Source data for Figure 5 - main figure and figure supplements 4 & 5
Individual data values for IL-1b release for the indicated figures.
Data were obtained as described in the appropriate figure legend and methods section.
Source data for Figure 5C
		IL-1b ng/ml
NLRP1	Protease	Replicate 1	Replicate 2	Replicate 3
WT	None	0.077815	0.111867	0.242401
WT	EV71	1.00858	0.980199	1.25262
WT	CVB3	4.29461	3.3071	4.83945
WT	PV1	2.53525	1.62152	1.75205
WT	EV68	1.85988	1.45693	1.26397
WT	HRVA	7.12095	5.9348	6.56476
WT	EMCV	0.0948411	0.372934	0.111867
WT	ParA	0.293479	0.265102	0.140244
WT	Aichi	0.0891657	0.123218	0.123218
WT	HepA	0.106192	0.174296	0.168621
WT	Sali	0.0210613	0.0891657	0.117543
WT	Rosa	3.6987	4.72594	4.02787
G131P	None	0.2247	0.1324	0.1651
G131P	EV71	0.5193	0.1651	0.2068
G131P	CVB3	0.3884	0.3467	0.0461
G131P	PV1	0.186	0.055	0.0788
G131P	EV68	0.3794	0.189	0.3229
G131P	HRVA	0.2991	0.2872	0.2544
G131P	EMCV	0.3437	0.2931	0.061
G131P	ParA	0.3021	0.2515	0.1265
G131P	Aichi	0.0401	0.1741	0.0282
G131P	HepA	0.2128	0.0491	0.0372
G131P	Sali	-0.0343	0.0282	-0.0015
G131P	Rosa	4.8616	4.5788	4.6711
Source data for Figure 5 - Figure supplement 4
			IL-1b ng/ml
NLRP1	TEV?	Protease	Replicate 1	Replicate 2	Replicate 3
WT-TEV	None	None	0.163569	0.0576863	-0.0285882
WT-TEV	TEV	None	3.62631	3.32043	3.07337
WT-TEV	TEV	EMCV	4.09298	4.06945	4.05769
WT-TEV	TEV	ParA	3.88514	3.82631	4.05769
WT-TEV	TEV	Aichi	0.520431	0.56749	0.630235
WT-TEV	TEV	HepA	0.312588	0.414549	0.351804
WT-TEV	TEV	SaliA	0.857686	0.394941	0.438078
Source data for Figure 5 - Figure supplement 5A
		IL-1b pg/ml
NLRP1	Virus	Replicate 1	Replicate 2	Replicate 3
WT	None	9.08374	10.8571	11.8424	Same data as displayed in Figure 3C
WT	CVB3	142.089	124.355	79.0345	Same data as displayed in Figure 3C
WT	EMCV	8.68966	6.52217	12.0394
None	EMCV	12.8276	6.91626	6.32512
G131P	EMCV	12.0394	6.12808	6.52217
Source data for Figure 5 - Figure supplement 5B
		IL-1b pg/ml
HaCaT	Virus	Replicate 1	Replicate 2	Replicate 3	Notes
WT	None	0.440945	1.54331	0.755906	Same data as displayed in Figure 3D
WT	CVB3	30.8346	28.6299	28.4724	Same data as displayed in Figure 3D
WT	EMCV	1.07087	0.598425	-0.346457
