# Supplementary material for: Diverse viral proteases activate the NLRP1 inflammasome
Source: eLife journal article supplement (doi:10.7554/elife.60609), 2021-01-07
Supplement: supp [file elife_poa_e60609_Figure_2_figure_supplement_1.pdf › elife_poa_e60609_Figure_2_figure_supplement_1.pdf]

| Class:<br>Buried (B),<br>Exposed (E) | Amino Acid<br>Position | Amino Acid | Relative<br>Surface<br>Accessibility | Absolute<br>Surface<br>Accessibility | Probability<br>For<br>Alpha-Helix | Probability<br>For<br>Beta-strand | Coil<br>Probability |
|--------------------------------------|------------------------|------------|--------------------------------------|--------------------------------------|-----------------------------------|-----------------------------------|---------------------|
| E                                    | 127                    | G          | 0.724                                | 56.997                               | 0.003                             | 0.002                             | 0.994               |
| E                                    | 128                    | C          | 0.450                                | 63.190                               | 0.004                             | 0.006                             | 0.990               |
| E                                    | 129                    | T          | 0.607                                | 84.168                               | 0.004                             | 0.014                             | 0.982               |
| E                                    | 130                    | Q          | 0.597                                | 106.589                              | 0.004                             | 0.022                             | 0.974               |
| E                                    | 131                    | G          | 0.534                                | 42.063                               | 0.012                             | 0.016                             | 0.972               |
| E                                    | 132                    | S          | 0.601                                | 70.429                               | 0.018                             | 0.023                             | 0.960               |
| E                                    | 133                    | E          | 0.557                                | 97.244                               | 0.025                             | 0.068                             | 0.908               |
| E                                    | 134                    | R          | 0.456                                | 104.412                              | 0.016                             | 0.127                             | 0.857               |
|                                      |                        |            |                                      |                                      |                                   |                                   |                     |
| E                                    | 1062                   | P          | 0.311                                | 44.067                               | 0.353                             | 0.016                             | 0.631               |
| E                                    | 1063                   | A          | 0.435                                | 47.991                               | 0.389                             | 0.029                             | 0.582               |
| E                                    | 1064                   | S          | 0.307                                | 35.976                               | 0.372                             | 0.038                             | 0.590               |
| E                                    | 1065                   | Q          | 0.406                                | 72.423                               | 0.204                             | 0.050                             | 0.746               |
| E                                    | 1066                   | G          | 0.384                                | 30.211                               | 0.136                             | 0.068                             | 0.797               |
| E                                    | 1067                   | D          | 0.321                                | 46.271                               | 0.103                             | 0.079                             | 0.818               |
| E                                    | 1068                   | L          | 0.321                                | 58.772                               | 0.058                             | 0.055                             | 0.887               |
| E                                    | 1069                   | H          | 0.459                                | 83.520                               | 0.047                             | 0.081                             | 0.872               |
|                                      |                        |            |                                      |                                      |                                   |                                   |                     |
| B                                    | 1170                   | V          | 0.085                                | 13.065                               | 0.087                             | 0.811                             | 0.102               |
| B                                    | 1171                   | A          | 0.062                                | 6.837                                | 0.085                             | 0.769                             | 0.146               |
| B                                    | 1172                   | L          | 0.165                                | 30.146                               | 0.087                             | 0.399                             | 0.514               |
| E                                    | 1173                   | Q          | 0.519                                | 92.645                               | 0.078                             | 0.213                             | 0.709               |
| E                                    | 1174                   | G          | 0.576                                | 45.362                               | 0.051                             | 0.051                             | 0.898               |
| E                                    | 1175                   | G          | 0.490                                | 38.555                               | 0.033                             | 0.028                             | 0.938               |
| E                                    | 1176                   | H          | 0.618                                | 112.433                              | 0.011                             | 0.108                             | 0.881               |
| B                                    | 1177                   | V          | 0.144                                | 22.068                               | 0.008                             | 0.171                             | 0.821               |
