# Supplementary material for: Diverse viral proteases activate the NLRP1 inflammasome
Source: eLife journal article supplement (doi:10.7554/elife.60609), 2021-01-07
Supplement: supp [file elife_poa_e60609_Figure_4_figure_supplement_1.pdf › elife_poa_e60609_Figure_4_figure_supplement_1.pdf]

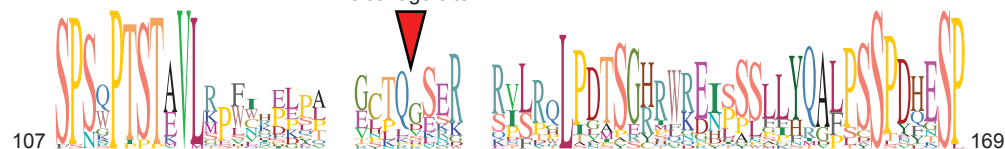

|                                                      |                      |          |                                      |
|------------------------------------------------------|----------------------|----------|--------------------------------------|
| Human ( <i>Homo sapiens</i> )                        | SPSQPTSTAVLMPWIHELPA | GCTQGSE  | RVLRLPDTSGRRWREISASLLYQALPSSPDHESP   |
| Chimpanzee ( <i>Pan troglodytes</i> )                | SPSQPTSTAVLMPWIHELPA | GCTQGSE  | RVLRLPDTSGRRWREISASLLYQALPSSPDHESP   |
| Gorilla ( <i>Gorilla gorilla</i> )                   | SPSKPTSTAVLMPWIHELPA | GCTQGSE  | RVLRLPDTSGRRWREISASLLYQALPSSPDHESP   |
| Orangutan ( <i>Pongo abelii</i> )                    | SPSQPTSTAVLMPWIHELPA | GCTQGSE  | RVLRLPDTSGRRWREISSLLYQALPSSPDYESP    |
| Gibbon ( <i>Nomascus leucogenys</i> )                | SPSQPTSTAVLMPWICELPA | GCTQGSE  | RVLRLPDTSGRRWREISSLLYQALPSSPDHESP    |
| Rhesus macaque ( <i>Macaca mulatta</i> )             | SPSQPTSTAVLRPWNRELPA | ECTQGSE  | RVLRLPDTSGRRWREISSLLYQALPSSPDFESP    |
| Baboon ( <i>Papio anubis</i> )                       | SPSQPTSTAVLRPWNRELPG | ECTQGSE  | RVLRLPDTSGRRWREISSLLYQAFPPSPDFESP    |
| African green monkey ( <i>Chlorocebus sabaeus</i> )  | SPSQPTSTAVLRPWNRELPA | ECTQGSE  | RVLRLPDTSGRRWREISSFLYQALPSSPDLESP    |
| Colobus ( <i>Colobus angolensis</i> )                | SPSQPTSTAVLRSNHELPA  | ECTQVSE  | RVLRLPDTSGHRWREISSLLYQALPSSPDFESP    |
| Snub-nosed monkey ( <i>Rhinopithecus roxellana</i> ) | SPSQPTSTAVLRPWNRLDPA | ECTQGSE  | RVLRLPDTSGHRWREISSLLYQALPSSPDFESP    |
| Marmoset ( <i>Callithrix jacchus</i> )               | SPNQPTSTAVLR-SQIPELQ | GCTQRSE  | SVSRRLPDTSGHQWREISSLLYQAPLSSLDYGSP   |
| Squirrel monkey ( <i>Saimiri boliviensis</i> )       | SPNRPTSTAVLR-SWIPELQ | GCTQGSE  | SVLRHLPDMSGHRWREITSSLLYQAPLSSPDYGS   |
| Galago ( <i>Otolemur garnettii</i> )                 | SP-NPPSPAVMQELEKIGYL | GTYQHSE  | RTSDQLTDTSRRHWKENPYLPFYQALPSSPDQQSP  |
| Sifaka ( <i>Propithecus coquereli</i> )              | SPSQPTSTAVLR-FCRPGSL | GHPKVER  | RISRWLPDASGHPFGEHLSSLLYQALPSSPDHESP  |
| Gray mouse lemur ( <i>Microcebus murinus</i> )       | SPSQPTSTAVLR-FCGSESP | GHPQVER  | KILRWLPDTSCHPFGEHLSSLLYQALPSSPDHESP  |
| Mouse ( <i>Mus musculus</i> )                        |                      |          | Linker unalignable                   |
| Rat ( <i>Rattus rattus</i> )                         |                      |          | Linker unalignable                   |
| Kangaroo rat ( <i>Dipodomys ordii</i> )              |                      |          | Linker unalignable                   |
| Beaver ( <i>Castor canadensis</i> )                  |                      |          | Linker unalignable                   |
| Squirrel ( <i>Ictidomys tridecemlineatus</i> )       | SPSWPTSTEVVK-FWNFPCT | GSTR-ESK | RIF---PVTPSHIQKGNPPLFLHRAPSSSTDQESP  |
| Marmot ( <i>Marmota marmota</i> )                    | SPSWPTSTEVVK-FWNFPCT | GSTQ-ESK | RIF---PVTPSHIQKGNPPLFLHRAPSSSTDQESP  |
| Damara mole rat ( <i>Fukomys damarensis</i> )        | SPSWPTPTAVLG-LLAHESL | ENPLDSGR | RILTGLSDISEHRVRENPS---YQAFPPSPDHESP  |
| Chinchilla ( <i>Chinchilla lanigera</i> )            | SPSWPTSTAVLR-FLGPDLS | ENPLDLER | RIFTGLPDMSGHRLRENHPSLCYQALPSSPDHTSP  |
| Pika ( <i>Ochotona princeps</i> )                    |                      |          | NLRP1 absent from genome             |
| Rabbit ( <i>Oryctolagus cuniculus</i> )              |                      |          | NLRP1 absent from genome             |
| Vampire bat ( <i>Desmodus rotundus</i> )             |                      |          | Linker unalignable                   |
| Big brown bat ( <i>Eptesicus fuscus</i> )            |                      |          | Linker unalignable                   |
| Little brown bat ( <i>Myotis lucifugus</i> )         |                      |          | Linker unalignable                   |
| Egyptian rousette ( <i>Rousettus aegyptiacus</i> )   |                      |          | NLRP1 absent from genome             |
| Large flying fox ( <i>Pteropus vampyrus</i> )        |                      |          | NLRP1 absent from genome             |
| Black flying fox ( <i>Pteropus alecto</i> )          |                      |          | NLRP1 absent from genome             |
| Cow ( <i>Bos taurus</i> )                            | SPSWPTSTVKLT-FCKPKQP | VLN-PLKW | SSSP-LIFASGYR-KD-LSPSIYQGFPPSPYHESP  |
| Sheep ( <i>Ovis aries</i> )                          | SPSWPTSTEVVK-VCKPKQP | VLKQSKNR | SPSP-LILASGYR-KD-LSLGIHQGFPPSPYHESP  |
| Goat ( <i>Capra hircus</i> )                         | SPSWPTSTEVVK-VCKPKQP | VLKQSKNR | SPSP-LILTSGYR-KD-FSLGIHQGFPPSPYHESP  |
| Killer whale ( <i>Orcinus orca</i> )                 |                      |          | NLRP1 absent from genome             |
| Bottlenose dolphin ( <i>Tursiops truncatus</i> )     |                      |          | NLRP1 absent from genome             |
| Narwhal ( <i>Monodon monoceros</i> )                 |                      |          | NLRP1 absent from genome             |
| Horse ( <i>Equus caballus</i> )                      | FSSAPTSTMVLG-HWVPEAP | GLLQDSQR | KNLRHLPGTSGHTWKENPPSFPPQDFPYSPVCESP  |
| Ferret ( <i>Mustela putorius</i> )                   | SPSGPTSTVVLV-FVQDPPT | T----SSK | QP----PGTSRCFLQNYPSFSFNRLVPCSNQKSL   |
| Giant panda ( <i>Ailuropoda melanoleuca</i> )        | SPSGPTSTEVVK-FVQDPET | G----SRR | QP----PGTSGHMWNPDPPSPFYQALPSSPDQESP  |
| Dog ( <i>Canis lupus</i> )                           | SPNSPISTEVLR-FIQDPRT | R----NSG | QPLPPLPNTSGHMWNEDPSSCKYQGLPDSFEQGS   |
| Cat ( <i>Felis catus</i> )                           |                      |          | NLRP1 absent from genome             |
| Lynx ( <i>Lynx canadensis</i> )                      |                      |          | NLRP1 absent from genome             |
| Tiger ( <i>Panthera tigris</i> )                     |                      |          | NLRP1 absent from genome             |
| Tenrec ( <i>Echinops telfairi</i> )                  | SPNGPTSTEVLR-FWDPDLV | TPLP-VKR | RESVTLADSYEHRGDRNPPSMLFM---WSPAHNSP  |
| Cape golden mole ( <i>Chrysochloris asiatica</i> )   | SPSKPTPTKVLV-TVDCDPL | VPLEEERG | EISKPLTDTCEHSWRDHQGNAPSTAFTCSPDHNSP  |
| Armadillo ( <i>Dasypus novemcinctus</i> )            | SPSWPTSTEVLS-LWGSKYL | C----SQD | SD----PAPAGCSWQDCSSWLGHII---SSPSHTSP |
