# Supplementary material for: Diverse viral proteases activate the NLRP1 inflammasome
Source: eLife journal article supplement (doi:10.7554/elife.60609), 2021-01-07
Supplement: supp [file elife_poa_e60609_Figure_5_figure_supplement_1.pdf › elife_poa_e60609_Figure_5_figure_supplement_1.pdf]

|                         |   |                                                                         |
|-------------------------|---|-------------------------------------------------------------------------|
| Coxsackievirus B3 3Cpro | 1 | GP--AFEFAVAMMK---RNSSTVKTEYG-----EFTMLGIYDRWAVLPRHAKPGP-----TILMN       |
| Enterovirus D68 3Cpro   | 1 | GP--GFDFAQAIMK---KNTVIARTEKG-----EFTMLGVYDRVAVIPHTHASVGE-----IIYIN      |
| Poliovirus 1 3Cpro      | 1 | GP--GFDYAVAMAK---RNIVTATTSKG-----EFTMLGVHDNVAILPHTHASPGE-----SIVID      |
| Rhinovirus A 3Cpro      | 1 | GP--EEEEGRSILK---NNTCVITTDNG-----KFTGLGIYDKTLIIPHTHADPGR-----EVQVN      |
| Enterovirus 71 3Cpro    | 1 | GP--SLDFALSLLR---RNIRQAQTDQG-----HFTMLGVRDRLAILPRHSQPGK-----TIWVE       |
| Hepatitis A virus 3Cpro | 1 | S---TLEIAGLVRK---NLVQFGVGEGKNCVR---WVMNALGVKDDWLLVPSHAYKFEKDYEMMEFYFNRG |
| Rosavirus A2 3Cpro      | 1 | GL--PQIYRPVVANCFPINFYDCDPRDNARSGGVFTLTAVGMYDRTYICNAHGFKDA-----THIGLR    |
| EMCV 3Cpro              | 1 | GPNPTMDFEKFVAK-FVTAPIGFVYPTGV-----STQTCLLVKGRTLAVNRHMAESD-----WTSIVVR   |
| Aichi virus 3Cpro       | 1 | G-----ISPAVPG-ISNNVVHVESGNGLNK---NVMSGFYIFSRFLLVPTHLEPH-----HTTLTVG     |
| Salivirus A 3Cpro       | 1 | G-----FDPAVMK-IMGNVDSFVTLSGTKP--IWTMSCLWIGGRNLIAPSHAFVSD---EYEITHIRVG   |
| Parechovirus A 3Cpro    | 1 | AP-----YDQGLEHIIISQMAYITGSTTG-----HITHCAGYQHDEIILHGHSIKYL--EQEELTLHYK   |

\*

|                         |    |                                                                          |
|-------------------------|----|--------------------------------------------------------------------------|
| Coxsackievirus B3 3Cpro | 51 | DQEVGVLDAKEL-VDKDGTNLELTLLKLNREKFRDIRGFLAKEEV---EVNEAVLAINTS-KFPNMYI     |
| Enterovirus D68 3Cpro   | 51 | DVETRVLDACAL-RDLTDTNLEITIVKLDNRNQKFRDIRHFLPRCED---DYNDAVLSVHTS-KFPNMYI   |
| Poliovirus 1 3Cpro      | 51 | GKEVEILDAKAL-EDQAGTNLEITITILKRNEKFRDIRPHIPTQIT---ETNDGVLIVNTS-KYPNMYV    |
| Rhinovirus A 3Cpro      | 51 | GIHTKVLDSDYL-YNRDGVKLEITVIKLDNRNEKFRDIRKYIPETED---DYPECNLALSAN-QVEPTII   |
| Enterovirus 71 3Cpro    | 51 | HKLINVLDAVEL-VDEQGVNLELTTLVLTDTNEKFRDITKFIPEVIT---GASDATLVINTE-HMPSMFV   |
| Hepatitis A virus 3Cpro | 63 | GTYYISISAGNVVQISLDVGFQDVVLMKVPTIPKFRDITQHFIIKKGDV-PRALNRLATLVTTV-NGTPMLI |
| Rosavirus A2 3Cpro      | 62 | GRVYPISEIKHVRNRHRTDLMIFQIPDGDCVRNILKYFRKSPK---EAPSRSPAVMAVRGKFNIDV       |
| EMCV 3Cpro              | 59 | GVSHTRSSVKIIAIAKAGKETDVSFIRLSSGPLFRDNTSKFVKASDVLP---HSSSPALIGIMNV DIPMMY |
| Aichi virus 3Cpro       | 55 | ADTYDWATLQTQ-----EFGEITIVHTPTSRQYKDMRRFIGAHP-----HPTGLLVSQF-KAAPLYV      |
| Salivirus A 3Cpro       | 59 | SRTLDSRVTRV-----DDGELSLLSVPDGPPEHKSILIRYIRSAS-----PKSGILASKF-SDTPVFV     |
| Parechovirus A 3Cpro    | 58 | NKVFPIEQPSVTQVTLLGGKPMDLAIVKCKLPFRFKNSKYITNKI-----GTESMLIWMTEQGIITKE     |

|                         |     |                                                                          |
|-------------------------|-----|--------------------------------------------------------------------------|
| Coxsackievirus B3 3Cpro | 114 | ---PVGQVTEYGFLNLGGTPTK-----RMLMYNFPTRAGQCGGVLMs-----TGKVLGIHVGG-NGHQ-    |
| Enterovirus D68 3Cpro   | 114 | ---PVGQVTNYGFLNLGGTPTH-----RILMYNFPTRAGQCGGVVTT-----TGKVIGIHVGG-NGAQ-    |
| Poliovirus 1 3Cpro      | 114 | ---PVGAVTEQGYLNLGGRQTA-----RTLMYNFPTRAGQCGGVITC-----TGKVIGMHVGG-NGSH-    |
| Rhinovirus A 3Cpro      | 114 | ---KVGDVVSYGNILLSGNQTA-----RMLKYNYPKSGYCGGVLYK-----IGQILGIHVGG-NGRD-     |
| Enterovirus 71 3Cpro    | 114 | ---PVGDDVVQYGFLNLSGKPTH-----RTMMYNFPKAGQCGGVVTS-----VGKIIIGIHIGG-NGRQ-   |
| Hepatitis A virus 3Cpro | 131 | SEGPLKMEEKATYVHKKNDGTTVDLTDVQAWRGKGEGLPGMCGGALVSSNQSIQNAILGIHVAG--GNSI   |
| Rosavirus A2 3Cpro      | 127 | ---LATCVESFAFVQMSGDVNY-----GALRYHAMTMPGYCGAPLISNDKA-AEKVLGIHMAS-NGAGI    |
| EMCV 3Cpro              | 126 | T--GTFLKAGVSVPVETGQTFN-----HCIHYKANTRKGWCGSAILADLGG-SKKILGFHSAG---SM-    |
| Aichi virus 3Cpro       | 110 | ---RISDNRI LDLDFPGVVVCK-----QAYGYRAATFEGLCGSPLVTDDPS-GVKILGLHVAGVAGTS-   |
| Salivirus A 3Cpro       | 114 | ---SFWNGKSHSTPLPGVVDEK-----DSFTYRCSSFGQLCGSPMIATDPG-GLGILGIHVAGVAGYN-    |
| Parechovirus A 3Cpro    | 120 | ---VQRVHSHSGGIKTREGTEST-----KTISYTVKSCCKGMC GGLLISKVEG-NFKILGMHIAG-NGEM- |

\* \*\*

\* \*

|                         |     |                           |
|-------------------------|-----|---------------------------|
| Coxsackievirus B3 3Cpro | 169 | GFSAA--LLKHYFNDE-----     |
| Enterovirus D68 3Cpro   | 169 | GFAAM--LLHSYFTDTQ-----    |
| Poliovirus 1 3Cpro      | 169 | GFAAA--LKRSYFTQSQ-----    |
| Rhinovirus A 3Cpro      | 169 | GFSAM--LLRSYFTDTQ-----    |
| Enterovirus 71 3Cpro    | 169 | GFCAG--LKRSYFASE-----     |
| Hepatitis A virus 3Cpro | 199 | LVAKL--VTQEMFQNIIDKKIE-SQ |
| Rosavirus A2 3Cpro      | 187 | AYGTS--VYQSDFENLE-----YE  |
| EMCV 3Cpro              | 183 | GVAASIIISQEMIDAVVQAFE-PQ  |
| Aichi virus 3Cpro       | 170 | GFSAP--IHP-ILGQITQFATTQQ  |
| Salivirus A 3Cpro       | 174 | GFSAR--LTPERVQAFLSHLATPQ  |
| Parechovirus A 3Cpro    | 179 | GVAIPFNFLKNDMSD-----Q     |
