# Supplementary material for: Diverse viral proteases activate the NLRP1 inflammasome
Source: eLife journal article supplement (doi:10.7554/elife.60609), 2021-01-07
Supplement: supp [file elife_poa_e60609_Figure_5_figure_supplement_2.pdf › elife_poa_e60609_Figure_5_figure_supplement_2.pdf]

## Amino acid identity between 3Cpros (%)

|                                       | <i>CVB3</i> | <i>EV68</i> | <i>PV1</i> | <i>HRVA</i> | <i>EV71</i> | <i>HepA</i> | <i>Rosa2</i> | <i>EMCV</i> | <i>Aichi</i> | <i>SaliA</i> | <i>ParA</i> |
|---------------------------------------|-------------|-------------|------------|-------------|-------------|-------------|--------------|-------------|--------------|--------------|-------------|
| <i>Coxsackievirus B3 3Cpro (CVB3)</i> |             | 67.0        | 61.0       | 47.3        | 54.9        | 19.2        | 18.5         | 17.8        | 19.0         | 19.1         | 16.5        |
| <i>Enterovirus D68 3Cpro (EV68)</i>   | 67.0        |             | 65.6       | 49.2        | 53.3        | 17.7        | 16.4         | 16.3        | 18.9         | 16.0         | 13.9        |
| <i>Poliovirus 1 3Cpro (PV1)</i>       | 61.0        | 65.6        |            | 43.7        | 54.9        | 17.2        | 17.4         | 19.7        | 18.4         | 14.5         | 15.4        |
| <i>Rhinovirus A 3Cpro (HRVA)</i>      | 47.3        | 49.2        | 43.7       |             | 45.6        | 17.2        | 18.9         | 16.3        | 19.9         | 20.0         | 15.4        |
| <i>Enterovirus 71 3Cpro (EV71)</i>    | 54.9        | 53.3        | 54.9       | 45.6        |             | 15.4        | 17.0         | 16.8        | 16.4         | 16.6         | 18.0        |
| <i>Hepatitis A virus 3Cpro (HepA)</i> | 19.2        | 17.7        | 17.2       | 17.2        | 15.4        |             | 18.1         | 20.3        | 17.9         | 17.0         | 15.5        |
| <i>Rosavirus A2 3Cpro (Rosa2)</i>     | 18.5        | 16.4        | 17.4       | 18.9        | 17.0        | 18.1        |              | 17.1        | 14.3         | 16.9         | 15.7        |
| <i>EMCV 3Cpro (EMCV)</i>              | 17.8        | 16.3        | 19.7       | 16.3        | 16.8        | 20.3        | 17.1         |             | 16.1         | 23.7         | 16.0        |
| <i>Aichi virus 3Cpro (Aichi)</i>      | 19.0        | 18.9        | 18.4       | 19.9        | 16.4        | 17.9        | 14.3         | 16.1        |              | 33.8         | 13.1        |
| <i>Salivirus A 3Cpro (SaliA)</i>      | 19.1        | 16.0        | 14.5       | 20.0        | 16.6        | 17.0        | 16.9         | 23.7        | 33.8         |              | 13.5        |
| <i>Parechovirus A 3Cpro (ParA)</i>    | 16.5        | 13.9        | 15.4       | 15.4        | 18.0        | 15.5        | 15.7         | 16.0        | 13.1         | 13.5         |             |
