# Supplementary material for: Diverse viral proteases activate the NLRP1 inflammasome
Source: eLife journal article supplement (doi:10.7554/elife.60609), 2021-01-07
Supplement: supp [file elife_poa_e60609_Figure_6_figure_supplement_1.pdf › elife_poa_e60609_Figure_6_figure_supplement_1.pdf]

|        |       |     |                                                                                                                         |
|--------|-------|-----|-------------------------------------------------------------------------------------------------------------------------|
| NLRP1B | (129) | 1   | M E E S P P K Q K S N T K V A Q H E G Q Q D L N T T - - - - R H M N V E L - K H R P K L E R H L K L G M I P V V Y M K Q |
| NLRP1B | (B6)  | 1   | M E Q S Q P K K K S R T K V A Q H E G Q L N L N P T F K T R K R K E V E L M K R R P K P E G H L K L G T I P K V H I K Q |
|        |       |     | ** * ** ** ***** ** * *** * ** * **** * * *                                                                             |
| NLRP1B | (129) | 56  | G E E I L Y P A Q S L R E E N L I Q N F T S L L L L Q K L C P K D P E N M I R K S W A S C V P E E G G H M I N I Q D L F |
| NLRP1B | (B6)  | 61  | K G E T L D P T W S R K R K N L V Q K L T N L L L F E K L C S R G S E N L I R K S W Y S C E E E E R G H M I E I Q D L F |
|        |       |     | * * * * ** * * *** *** ** ***** ** ** ***** *****                                                                       |
| NLRP1B | (129) | 116 | G P N I G T Q K E P Q L V I I E G A A                                                                                   |
| NLRP1B | (B6)  | 121 | G P N R G T H K K P Q L V I I E G A A                                                                                   |
|        |       |     | *** ** * *****                                                                                                          |
|        |       |     | <u>                </u><br>Start of NBD                                                                                 |
