# Supplementary figures and images for: Diverse viral proteases activate the NLRP1 inflammasome
Source: eLife journal article supplement (doi:10.7554/elife.60609), 2021-01-07

**A**

## Un-optimized motif

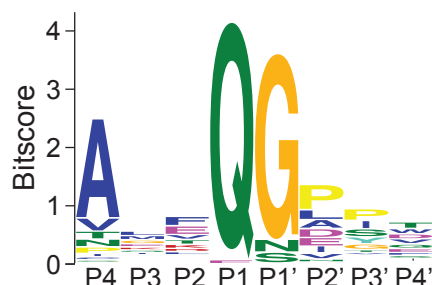

2678 enteroviral polyproteins

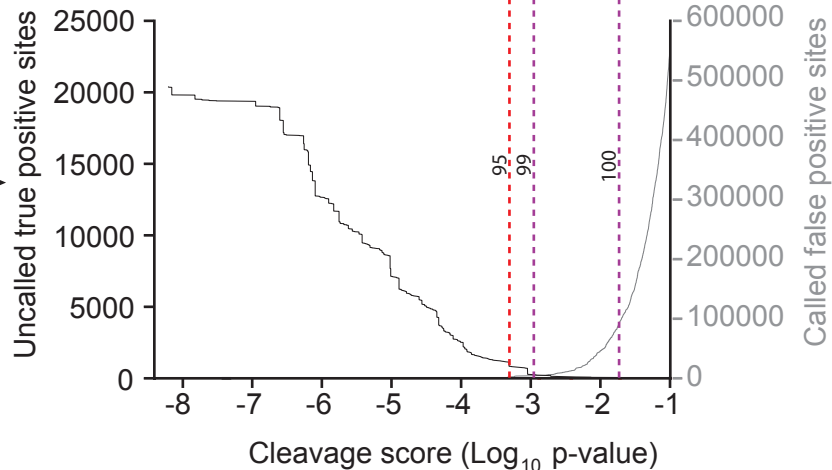**B**

## Optimized motif

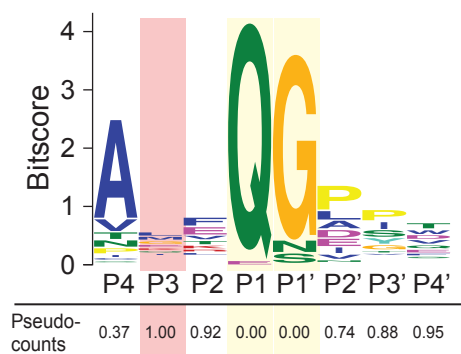

2678 enteroviral polyproteins

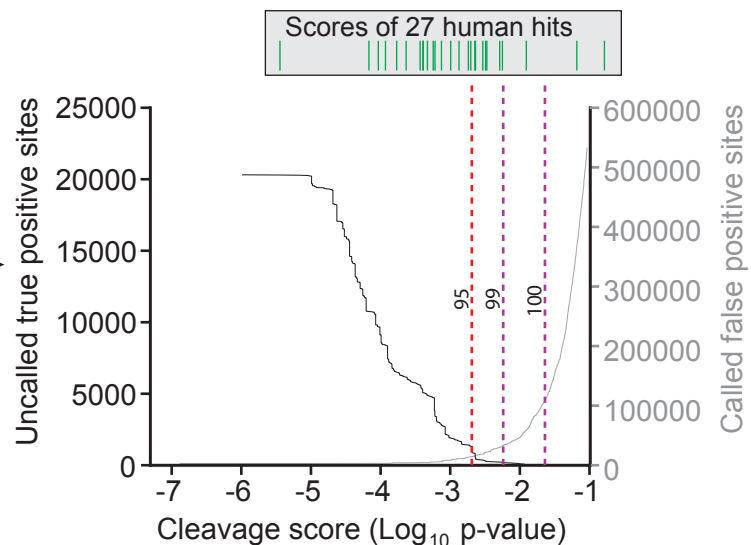

Supplement: supp [file elife_poa_e60609_Figure_1_figure_supplement_1.pdf › elife_poa_e60609_Figure_1_figure_supplement_1.pdf]

**A**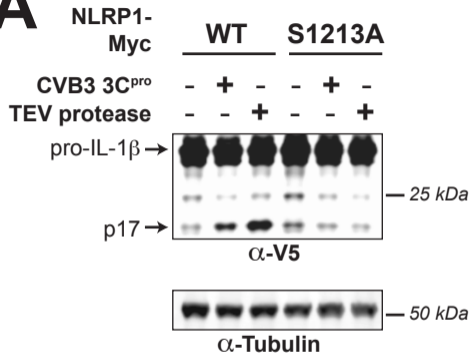**B**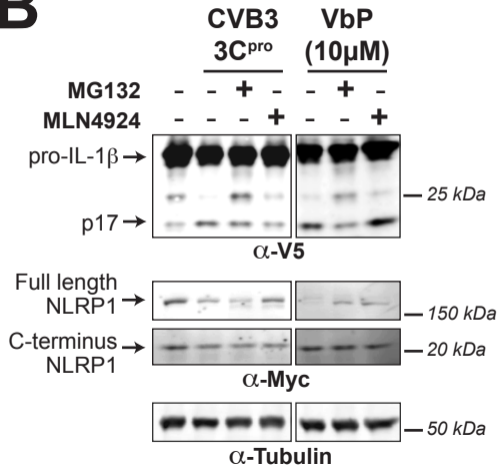

Supplement: supp [file elife_poa_e60609_Figure_3_figure_supplement_1.pdf › elife_poa_e60609_Figure_3_figure_supplement_1.pdf]

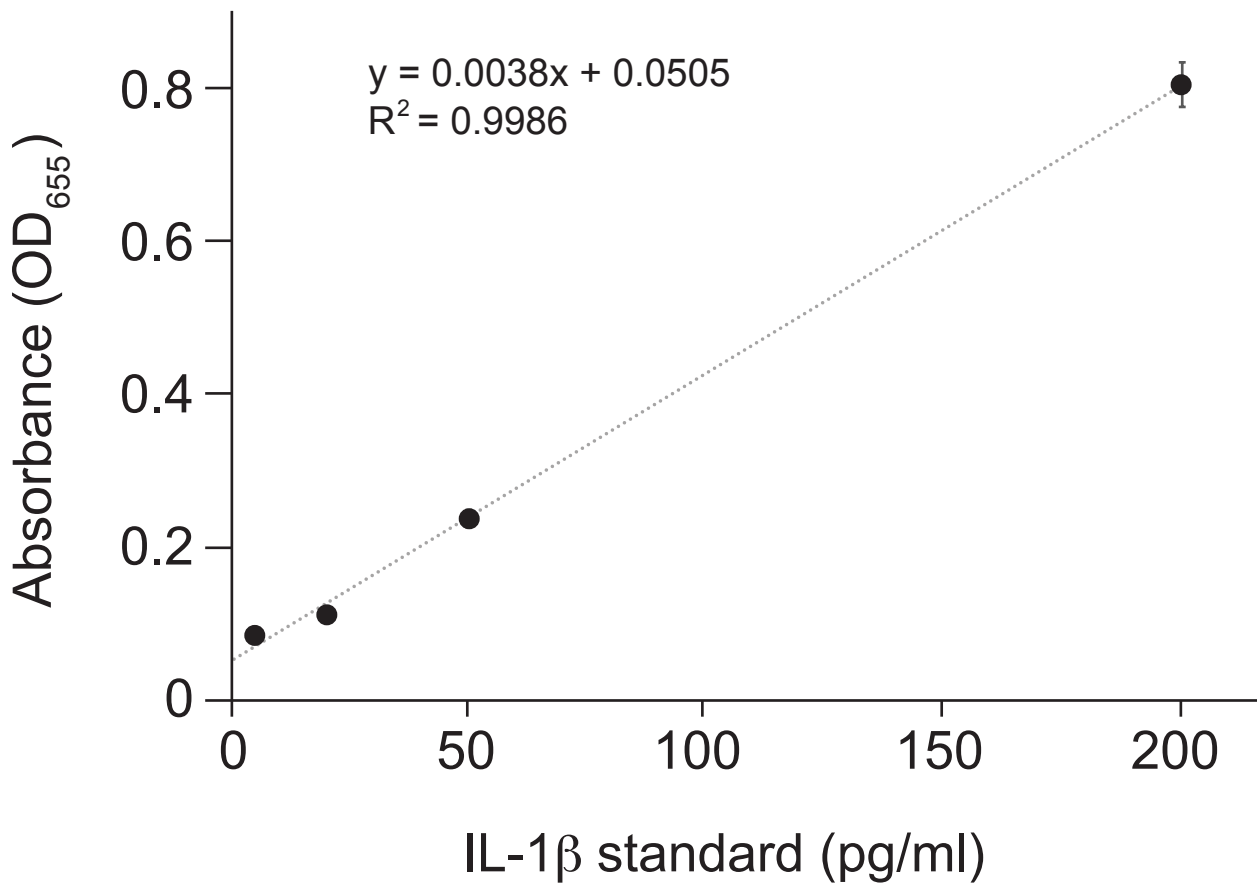

Supplement: supp [file elife_poa_e60609_Figure_3_figure_supplement_2.pdf › elife_poa_e60609_Figure_3_figure_supplement_2.pdf]

**A**

## *NLRP1* Knockouts

### *NLRP1* exon 5

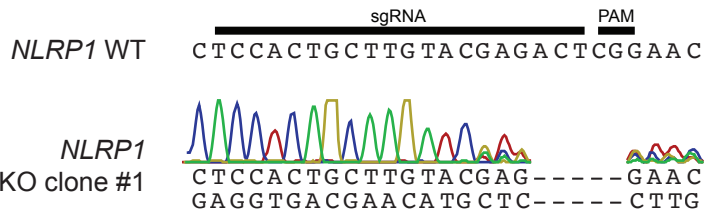

### *NLRP1* exon 2

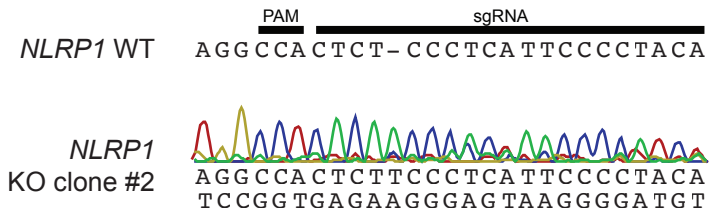**B**

## *CASP1* Knockouts

### *CASP1* intron1/exon 2

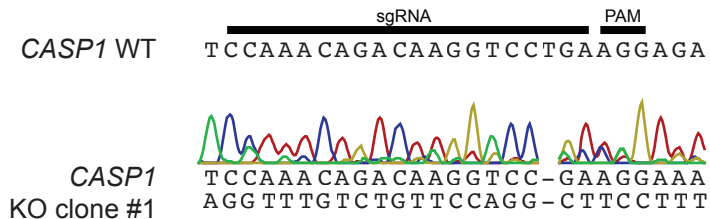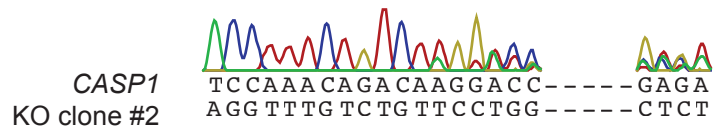

Supplement: supp [file elife_poa_e60609_Figure_3_figure_supplement_3.pdf › elife_poa_e60609_Figure_3_figure_supplement_3.pdf]

# Human NLRP1-TEV

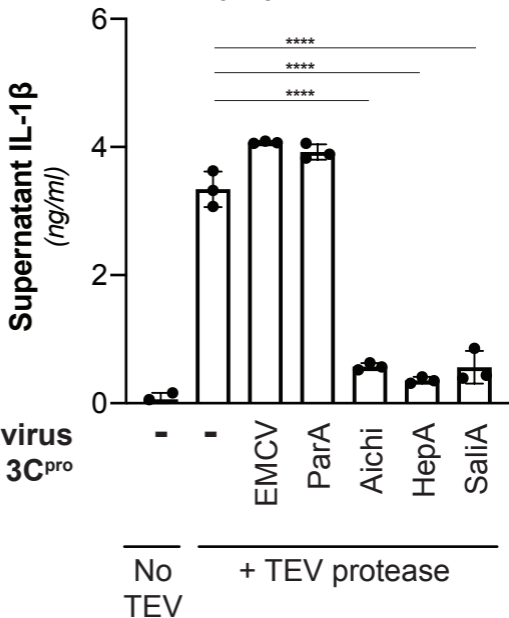

Supplement: supp [file elife_poa_e60609_Figure_5_figure_supplement_4.pdf › elife_poa_e60609_Figure_5_figure_supplement_4.pdf]

**A**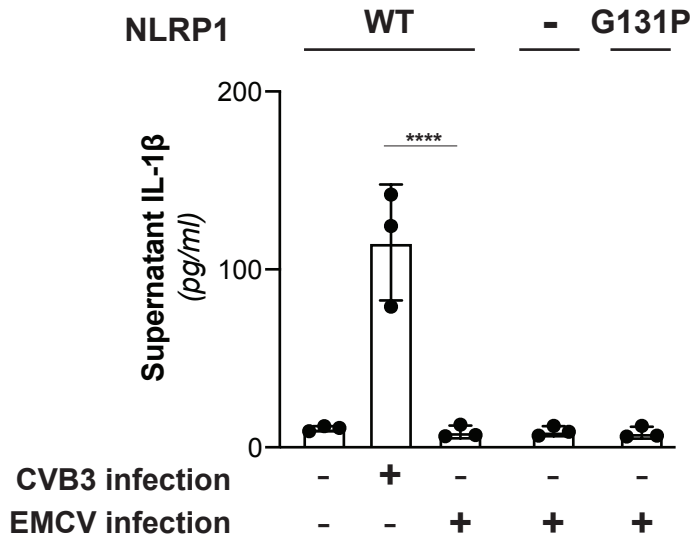**B**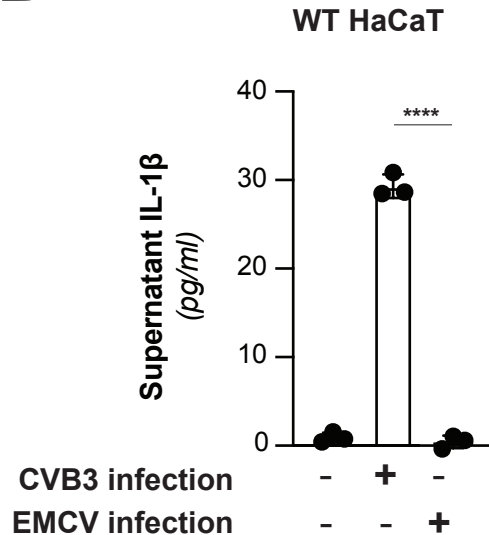

Supplement: supp [file elife_poa_e60609_Figure_5_figure_supplement_5.pdf › elife_poa_e60609_Figure_5_figure_supplement_5.pdf]
